# Supplementary material for: Gap junction protein Innexin2 modulates the period of free-running rhythms in Drosophila melanogaster
Source: PubMed Central journal article supplement — iScience. 2021 Aug 20;24(9):103011. doi: 10.1016/j.isci.2021.103011 (PMC8426565; doi:10.1016/j.isci.2021.103011), 2021-08-20
Supplement: mmc1.pdf [file mmc1.pdf]

iScience, Volume 24

**Supplemental information**

**Gap junction protein Innexin2 modulates  
the period of free-running rhythms  
in *Drosophila melanogaster***

**Aishwarya Ramakrishnan and Vasu Sheeba**

A

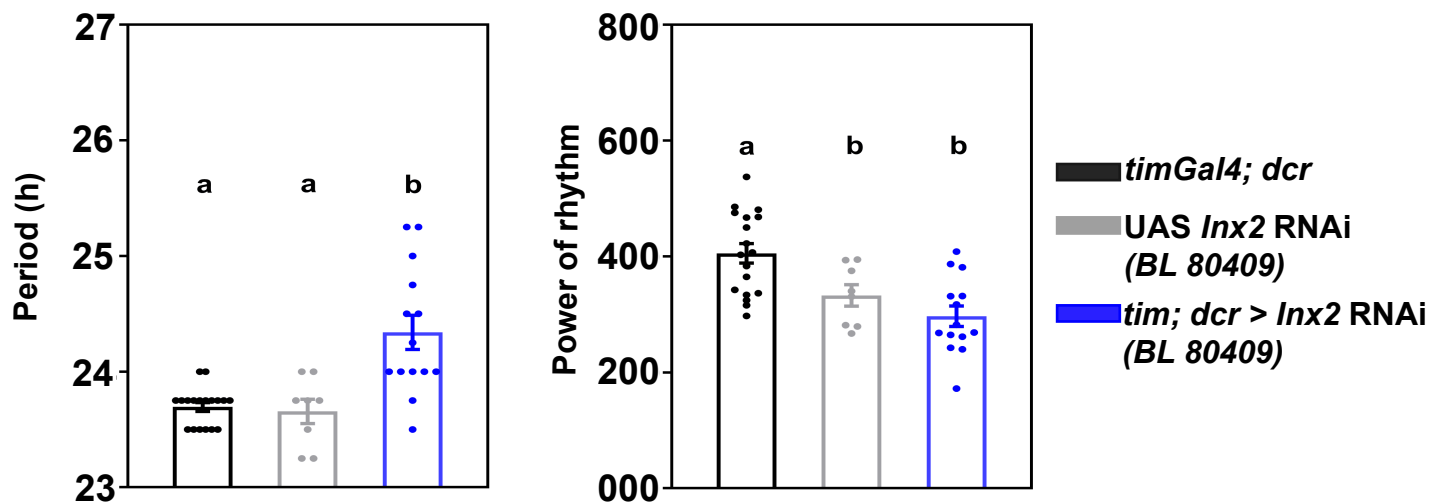

B

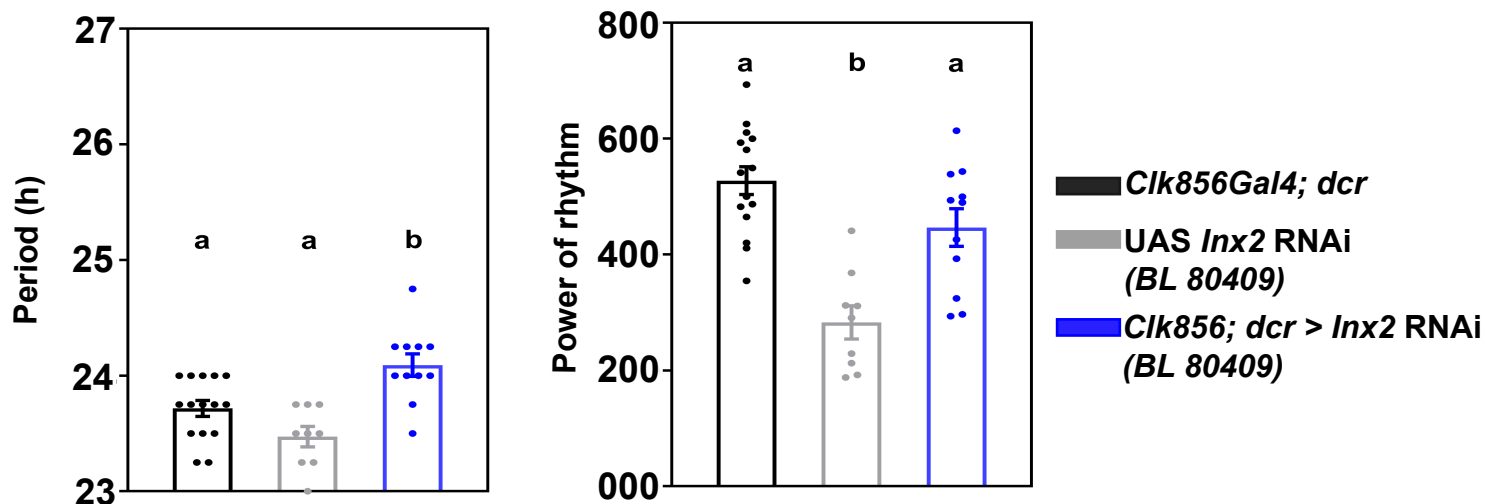

**Supplementary fig. S1: Knockdown of *Innexin2* using a different construct (BL 80409) lengthens free-running period, related to Figure 2 (A)** Mean free-running period (left) of flies with *Innexin2* downregulated in all clock neurons (*tim; dcr > Inx2* RNAi) ( $n=15$ ) is significantly longer than both its Gal4 ( $n=18$ ) and UAS control ( $n=8$ ) genotypes, (one-way ANOVA, post-hoc Tukey's test,  $p < 0.01$ ) while the power of rhythm (right) is significantly lower from only the Gal4 control, (One-way ANOVA, post-hoc Tukey's test,  $p < 0.001$ ). **(B)** Mean free-running period (left) of flies with *Innexin2* downregulated in all clock neurons (*Clk856 > dcr; Inx2* RNAi) ( $n=11$ ) is significantly longer than both its Gal4 ( $n=15$ ) and UAS control ( $n=9$ ) genotypes, (one-way ANOVA, post-hoc Tukey's test,  $p < 0.01$ ). Power of rhythm of experimental flies is only significantly different from the UAS control flies (One-way ANOVA, post-hoc Tukey's test,  $p < 0.001$ ).

Error bars are SEM, period values are determined using Chi-square periodogram for a period of 8 days. All statistical comparisons were performed using one-way ANOVA with genotype as a fixed factor, followed by post-hoc analysis using Tukey's Honest Significant Difference (HSD) test.

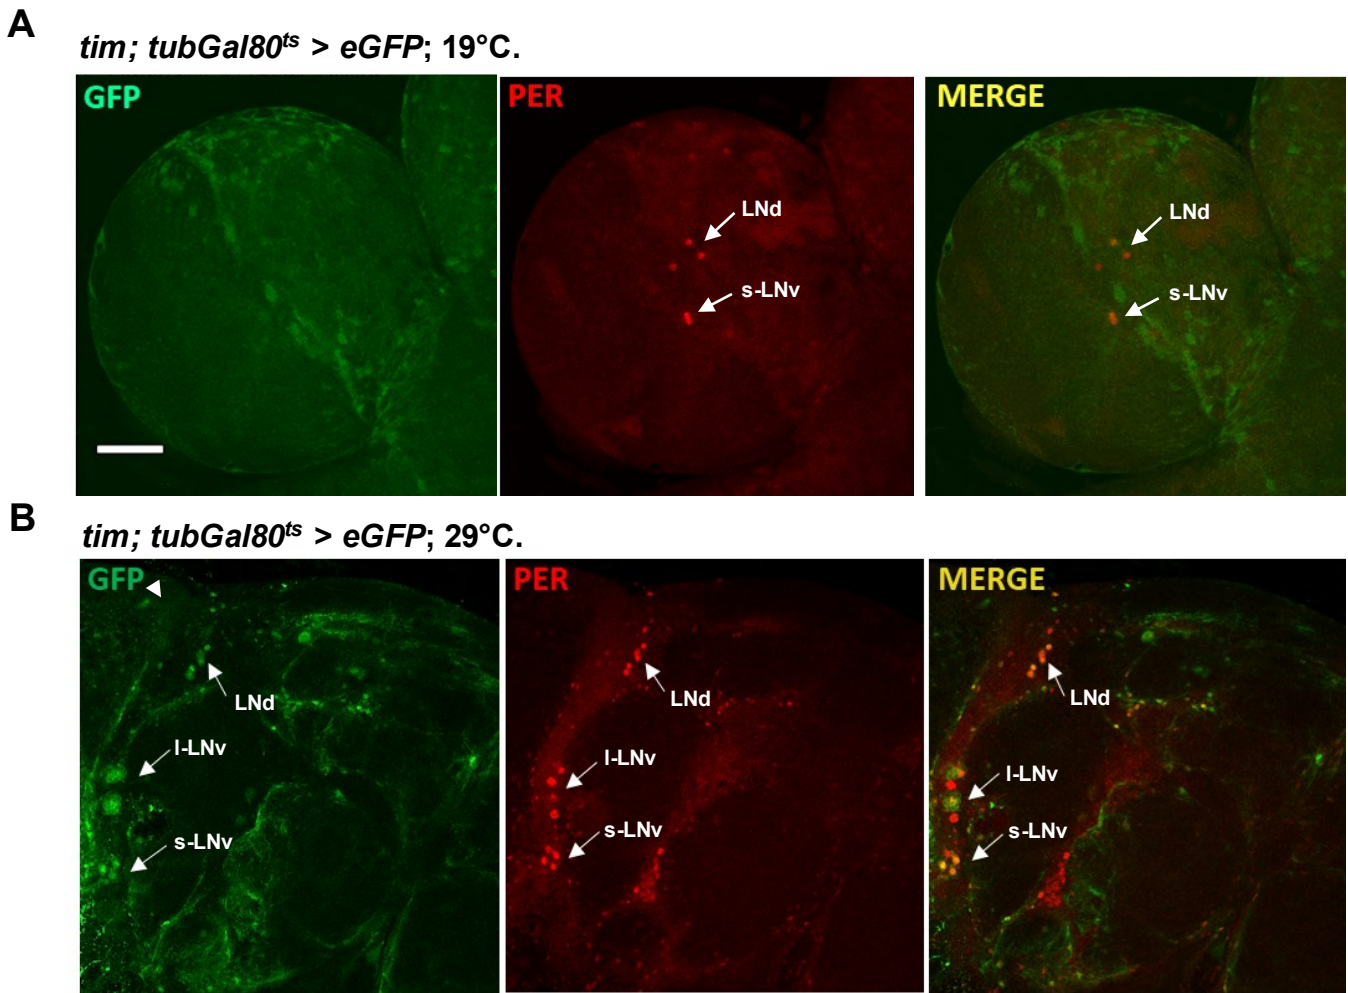

**Supplementary fig. S2: Verification of the efficiency of *tubGal80<sup>ts</sup>* construct, related to Figure 3** (A) The efficiency of *tim; tubGal80<sup>ts</sup>* construct was verified by crossing with *eGFP*. The flies were reared at a permissive temperature of 19°C. Larvae (L3 stage) from the progeny were dissected and stained with anti-GFP and anti-PER antibodies. s-LNv do not show presence of GFP in permissive temperatures (left), whereas strong PER staining was observed in these cells (middle panel). (B) Adult male flies were transferred to 29°C, 3 days after eclosion, dissected on day 7 and stained with antibodies against GFP and PER. s-LNv, I-LNv and LNds show GFP expression under a restrictive temperature of 29°C. *n*=5 brain samples at each temperature. Scale bars represent 55µm.

**A*****LNdGal4 > eGFP*, co-localized with PER**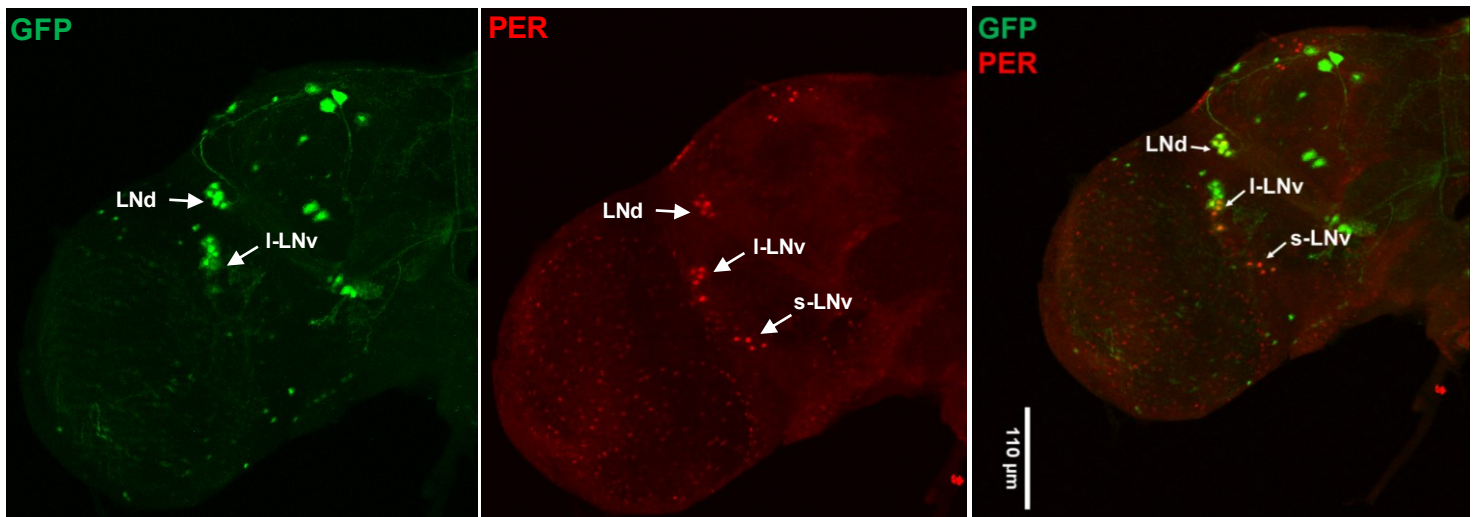**B** ***tim;pdfGal80 > eGFP*, co-localized with PER antibody**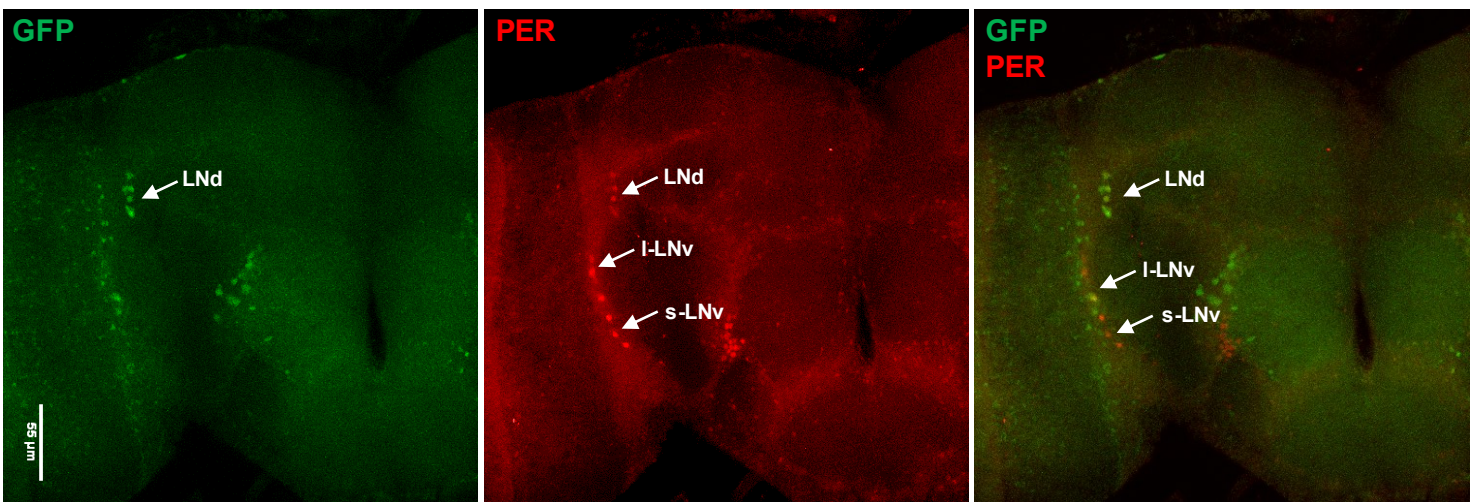

**Supplementary fig.S3: Expression pattern of *LNdGal4* and verification of the efficiency of *pdfGal80* construct, related to Figure 4** (A) *LNdGal4 > e-GFP* co-stained with anti-PER antibody shows strong GFP expression in all 6 LNds and faint GFP expression in some I-LNvs as previously reported. No GFP expression was detected in s-LNvs,  $n=5$  brain samples. Scale bar represents 110 $\mu$ m. (B) The efficiency of *tim; pdfGal80* construct in suppressing *Gal4* driven UAS expression was verified by crossing *timGal4; pdfGal80* with GFP, dissecting the brains at ZT22 and staining with GFP and PER. Both s-LNv and I-LNv did not show any GFP staining (left), whereas PER staining was observed in all lateral clock neurons (middle).  $n=6$  brain samples. Scale bars represent 55 $\mu$ m.

A

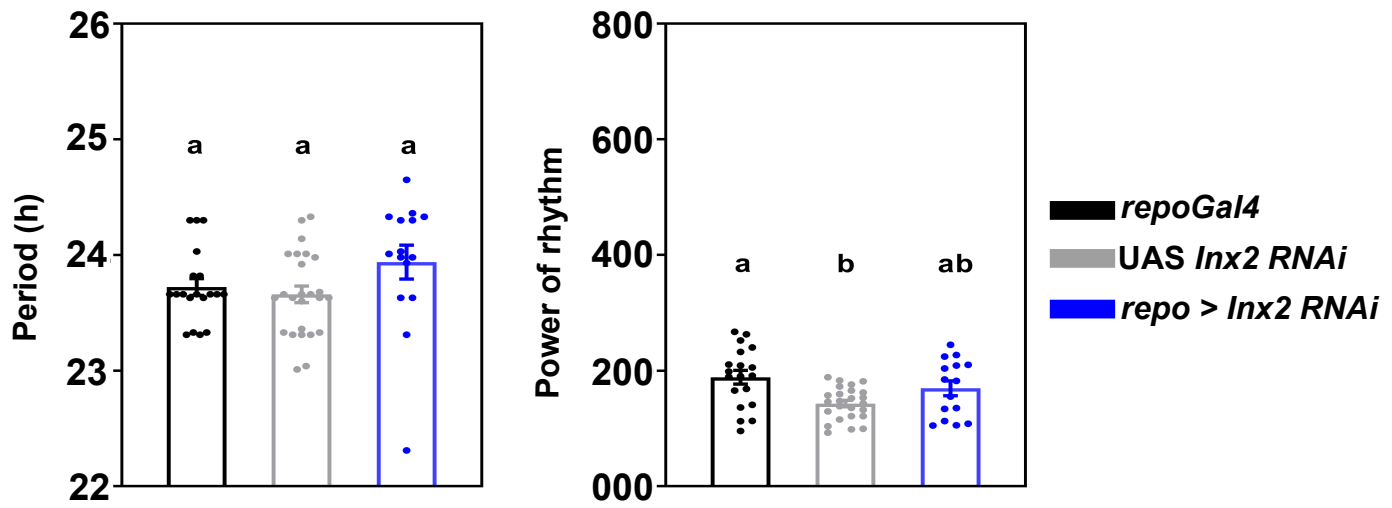

B

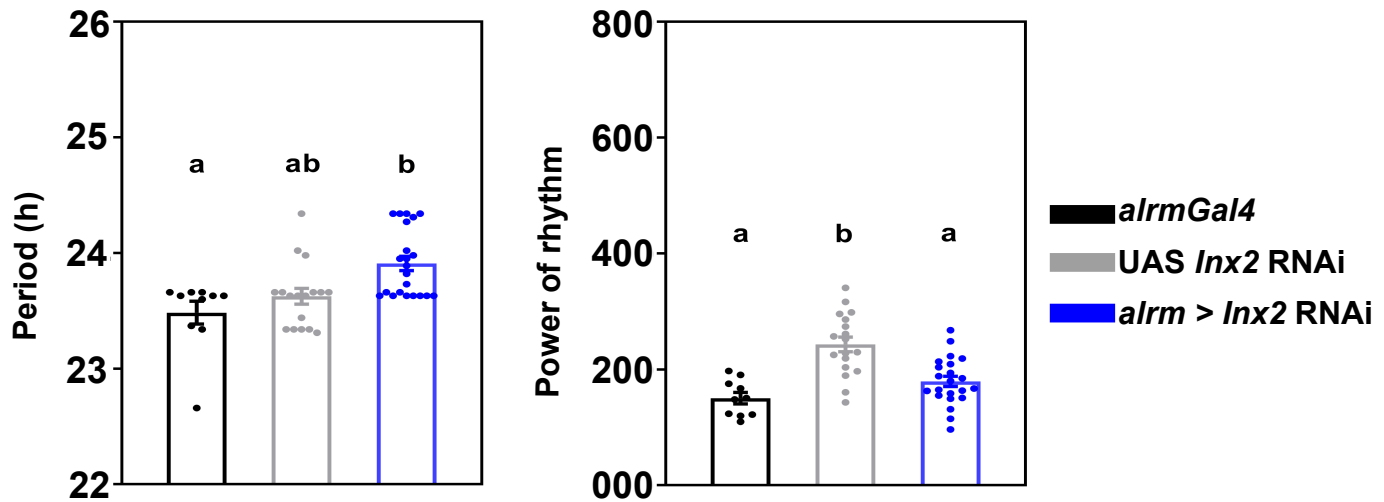

**Supplementary fig. S4: Knockdown of *Innexin2* in glial cells does not affect the free-running period, related to Figure 4** (A) Free-running period of experimental flies (*repo > Inx2 RNAi*) ( $n=15$ ) is not significantly different from both its Gal4 ( $n=21$ ) and UAS ( $n=25$ ) parental control flies. Power of rhythm (right) of experimental flies is also not different from its parental control genotypes. (B) Free-running period of experimental flies (*alrm > Inx2 RNAi*) ( $n=26$ ) is only significantly different from its Gal4 control ( $n=15$ ) and not from its UAS parental control ( $n=18$ ) flies (one-way ANOVA followed by post-hoc Tukey's test,  $p < 0.01$ ). Power of rhythm of experimental flies is only different from its UAS parental control (one-way ANOVA followed by post-hoc Tukey's test,  $p < 0.001$ ). Error bars are SEM, period and power values are determined using Chi-square periodogram for a period of 8 days. All statistical comparisons were performed using one-way ANOVA with genotype as a fixed factor, followed by post-hoc analysis using Tukey's Honest Significant Difference (HSD) test.

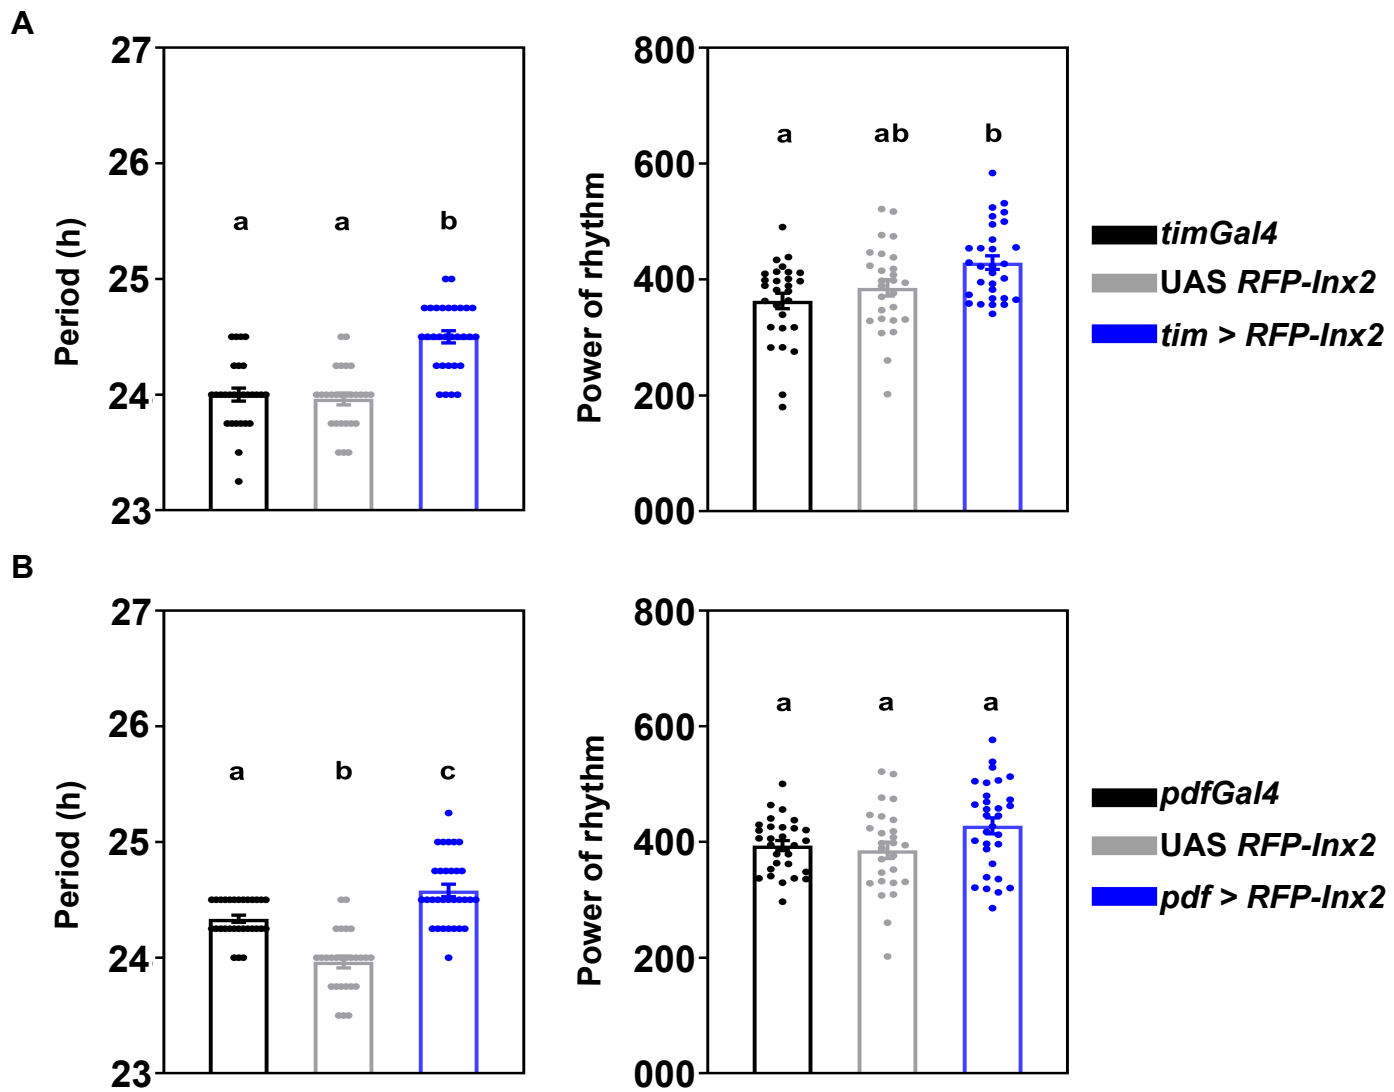

**Supplementary fig. S5: Altering the gap junction forming domain of *Innexin2* lengthens free-running period, related to Figure 4** (A) Free-running period of experimental flies (*tim > RFP-Inx2*) ( $n=30$ ) is significantly longer than both its Gal4 ( $n=28$ ) and UAS ( $n=27$ ) parental control flies, (one-way ANOVA, post-hoc Tukey's test,  $p < 0.001$ ). Power of rhythm (right) of experimental flies is only different from its Gal4 control genotype (one-way ANOVA, post-hoc Tukey's test,  $p < 0.01$ ). (B) Free-running period of experimental flies (*pdf > RFP-Inx2*) ( $n=31$ ) is significantly longer than both its Gal4 ( $n=29$ ) and UAS ( $n=27$ ) parental control flies, (one-way ANOVA, post-hoc Tukey's test,  $p < 0.001$ ). Power of rhythm of experimental flies is not different from both its control genotypes. Error bars are SEM, period and power values are determined using Chi-square periodogram for a period of 8 days, All statistical comparisons were performed using one-way ANOVA with genotype as a fixed factor, followed by post-hoc analysis using Tukey's Honest Significant Difference (HSD) test.

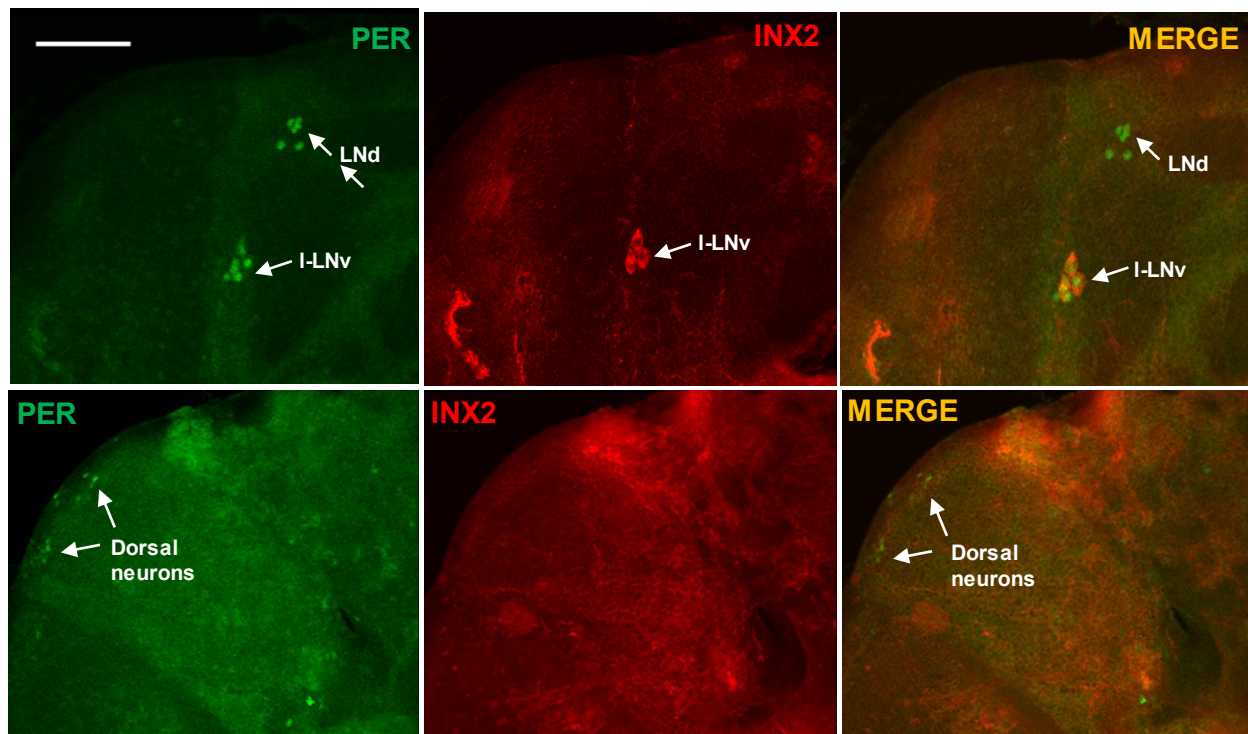

**Supplementary fig. S6: Innexin2 is only expressed in the small and large ventral lateral neurons in the circadian pacemaker circuit, related to Figure 5** Representative images from *w<sup>1118</sup>* *Drosophila* adult brains showing the distribution of *Inx2* protein among the clock cells. *w<sup>1118</sup>* flies were dissected at ZT4 and stained with anti-INX2 antibody and co-stained with anti-PER for identification and co-localization with clock neurons. INX2 was not found to be co-localized with the LNds (top panel) or the DNs (bottom panel). Brightness and contrast of representative images were adjusted in Fiji to facilitate better visualization. Arrows are used to indicate I-LNvs, LNds and DNs. Scale-bar represents 55  $\mu\text{m}$ ,  $n = 8$  brain samples.

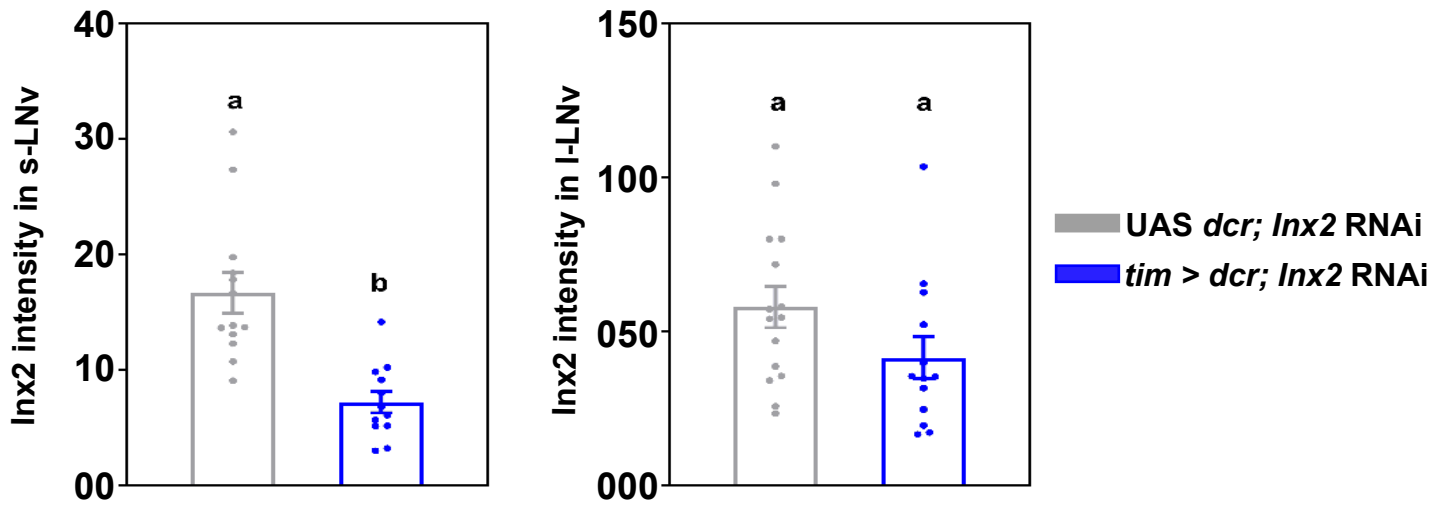

**Supplementary fig. S7: Verification of *Innexin2* RNAi, related to Figures 2, 4 and 5** *Innexin2* RNAi construct was verified by dissecting adult brains of both control (*dcr*; *Inx2* RNAi) and experimental flies (*tim* > *dcr*; *Inx2* RNAi) at ZT12 and staining them with anti-INX2 antibody. *Inx2* intensity was quantified in both s-LNVs and I-LNVs and compared between control and experimental flies. *Inx2* levels were lower in s-LNVs (left) in case of experimental flies ( $n=12$  brains, Mann Whitney U test,  $p < 0.001$ ). In I-LNVs (right) there was only a decreasing trend observed in *Inx2* levels in experimental flies as compared to control flies ( $n=13$  brains, Mann Whitney U test,  $p > 0.05$ ). Error bars are SEM. Each dot represents the mean *Inx2* intensity value for each cell type averaged over both the hemispheres of one brain. The experimental and control genotypes were compared using the Mann-Whitney U test for each cell type.



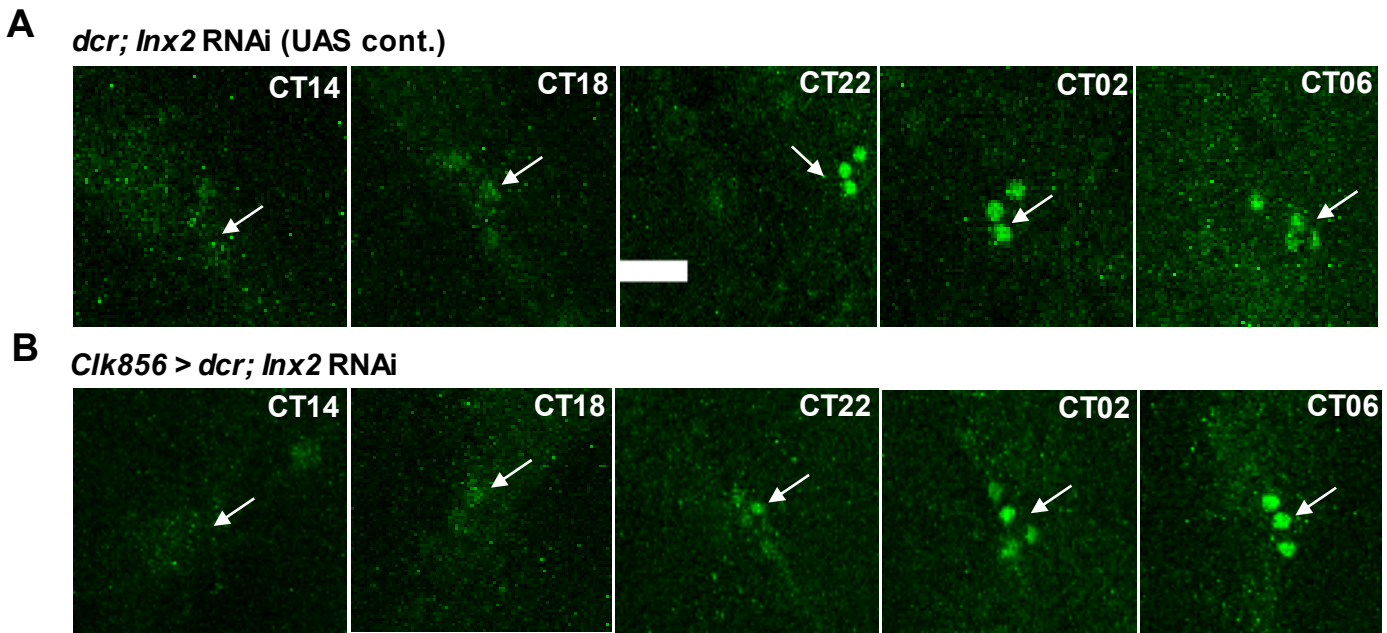

**Supplementary fig. S8: Knockdown of *Innexin2* delays the phase of oscillation of PER protein in s-LNv, related to Figure 6:** Representative images of PER intensity in s-LNv at five different time points of a 24-h cycle on the third day of DD 25°C in both control (UAS *dcr Inx2 RNAi*) (**A**) and experimental (*Clk856 > dcr; Inx2 RNAi*) (**B**) flies. Phase of PER oscillations is delayed in brain samples of experimental flies as compared to the control flies. Scale bar represents 55µm.

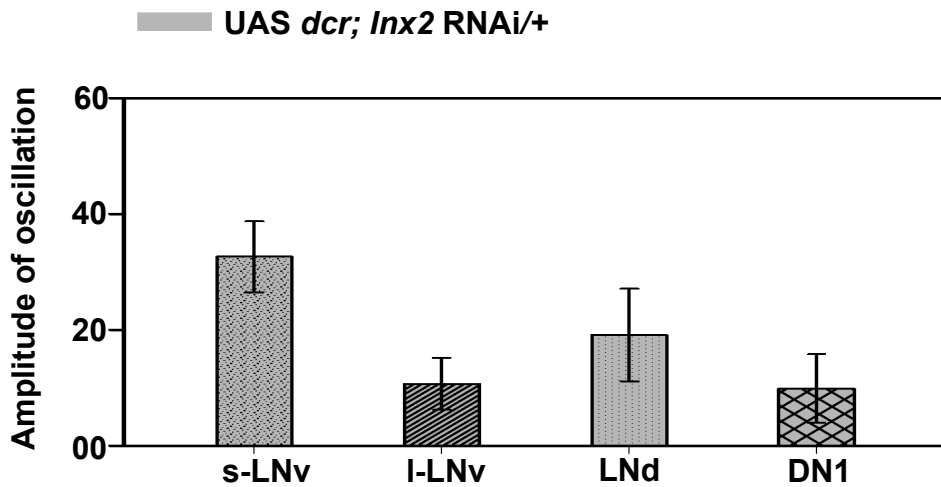

**Supplementary fig. S9: Amplitude of PER oscillations are different in circadian neuronal subsets on third day of DD, related to Figure 6** Amplitude values of PER oscillation in circadian neuronal subsets, obtained from COSINOR curve fits are plotted for control (UAS *dcr*; *Inx2* RNAi) flies. Error bars are 95% CI values calculated from the standard error obtained from COSINOR analysis. Non-overlapping error bars in case of I-LNv, and DN1 compared to s-LNv indicate that these amplitude values are different from s-LNv. COSINOR analysis was implemented using the CATCosinor function from the CATkit package written for R (Lee Gierke and Cornelissen, 2016).

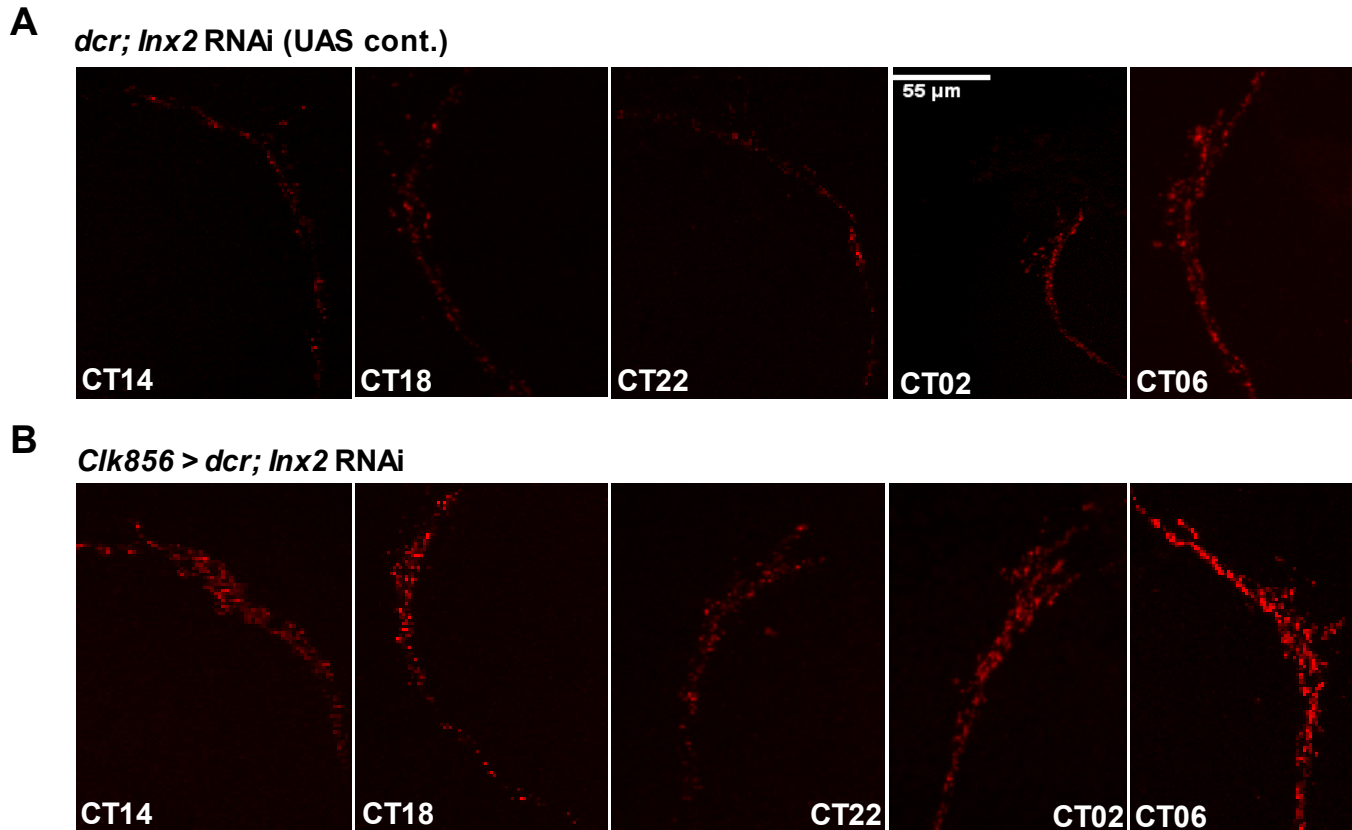

**Supplementary fig. S10: Knockdown of *Innexin2* increases the amplitude of PDF cycling in dorsal projections, related to Figure 7** Representative images of PDF intensity in s-LNv dorsal projections at five different time points of a 24-h cycle on third day of DD 25°C in both control (*UAS dcr;Inx2 RNAi*) (**A**) and experimental (*Clk856 > dcr;Inx2 RNAi*) (**B**) flies. Amplitude of PDF oscillation is increased in experimental genotype as compared to the controls. Scale bar represents 55μm.
